# Supplementary material
Source: PubMed Central journal article supplement (PMC100326)
Supplement: 1472-6963-2-4-S1.pdf [file 1472-6963-2-4-S1.pdf]

## Reference list of the 90 reviews included in the survey

1. Anand S. Does this patient have deep vein thrombosis? *JAMA* 1998;**279**:1094-9.
2. Attia J. Diagnosis of thyroid disease in hospitalized patients: a systematic review. *Archives of Internal Medicine* 1999;658-65.
3. Badgett R. Can the clinical examination diagnose left-sided heart failure in adults? *JAMA* 1997;**277**:1712-9.
4. Barlow J S. Systematic review of the school entry medical examination. *Archives of Disease in Childhood* 1998;**78**:301-11.
5. Bastian L A. Diagnostic efficiency of home pregnancy test kits: a meta-analysis. *Archives of Family Medicine* 1998;**7**:465-9.
6. Bastian L A. Is this patient pregnant? Can you reliably rule in or rule out early pregnancy by clinical examination? *JAMA* 1997;**278**:586-91.
7. Bax J J. Accuracy of currently available techniques for prediction of functional recovery after revascularization in patients with left ventricular dysfunction due to chronic coronary artery disease: comparison of pooled data. *Journal of the American College of Cardiology* 1997;**30**:1451-60.
8. Becker D. D-dimer testing and acute venous thromboembolism. *Archives of Internal Medicine* 1996;939-46.
9. Bonis P A. Correlation of biochemical response to interferon alfa with histological improvement in hepatitis C: a meta-analysis of diagnostic test characteristics. *Hepatology* 1997;**26**:1035-44.

10. Bradley K A B. Alcohol screening questionnaires in women: a critical review. *JAMA* 1998;  
**280**:166-71.
11. Buntinx F. Relation between sampling device and detection of abnormality in cervical smears: a meta-analysis of randomised and quasi-randomised studies. *British Medical Journal* 1996;1285-90.
12. Buntinx F. The diagnostic value of macroscopic haematuria in diagnosing urological cancers: a meta-analysis. *Family Practice* 1997;**14**:63-8.
13. Cabana M. Morphine-augmented hepatobiliary scintigraphy: a meta-analysis. *Nuclear Medicine Communications* 1995;**16**:1068-71.
14. Carlson K J. Screening for ovarian cancer. *Annals of Internal Medicine* 1994;**121**:124-32.
15. Chesson A L. The indications for polysomnography and related procedures, part 6 of 7: insomnia. *Sleep* 1997;**20**:471-6.
16. Chesson A L. The indications for polysomnography and related procedures, part 1 of 7: sleep-related breathing disorders (sleep apnea and upper airway resistance syndrome). *Sleep* 1997;**20**:424-45.
17. Chesson A L. The indications for polysomnography and related procedures, part 2 of 7: other respiratory disorders. *Sleep* 1997;**20**:445-50.
18. Chesson A L. The indications for polysomnography and related procedures, part 7 of 7: circadian rhythm sleep disorders. *Sleep* 1997;**20**:476-7.
19. Chesson A L. The indications for polysomnography and related procedures, part 4 of 7: parasomnias and sleep-related epilepsy. *Sleep* 1997;**20**:454-62.

20. Chesson A L. The indications for polysomnography and related procedures, part 3 of 7: narcolepsy and idiopathic hypersomnia. *Sleep* 1997;**20**:450-4.
21. Chesson A L. The indications for polysomnography and related procedures, part 5 of 7: restless legs syndrome and periodic limb movement disorder. *Sleep* 1997;**20**:462-71.
22. Chien P F W. The diagnostic accuracy of cervico-vaginal fetal fibronectin in predicting preterm delivery: an overview. *British Journal of Obstetrics & Gynaecology* 1997;**104**:436-44.
23. Coetzee K. Predictive value of normal sperm morphology: a structured literature review. *Human Reproduction Update* 1998;**4**:73-82.
24. Coley C M. Early detection of prostate cancer part 1: prior probability and effectiveness of tests. *Annals of Internal Medicine* 1997;**126**:394-406.
25. Conde-Agudelo A K. Triple-marker test as screening for Down syndrome: a meta-analysis. *Obstetrical and Gynecological Survey* 1998;**53**:369-76.
26. Da Silva O. Accuracy of leukocyte indices and c-reactive protein for diagnosis of neonatal sepsis: a critical review. *Pediatric Infectious Disease Journal* 1995;**14**:362-6.
27. De Bernardinis M. Discriminant power and information content of Ranson's prognostic signs in acute pancreatitis: a meta-analytic study. *Critical Care Medicine* 1999; **27**:2272-83.
28. de Vries S O H. Summary receiver operating characteristic curves as a technique for meta-analysis of the diagnostic performance of duplex ultrasonography in peripheral arterial disease. *Academic Radiology* 1996;**3**:361-9.

29. Devous M D. SPECT brain imaging in epilepsy: a meta-analysis. *Journal of Nuclear Medicine* 1998;**39**:285-93.
30. Di Fabio RP. Meta-analysis of the sensitivity and specificity of platform posturography. *Archives of Otolaryngology Head and Neck Surgery* 1996;**122**:150-6.
31. Fahey M T. Meta-analysis of pap test accuracy. *American Journal of Epidemiology* 1995;**141**:680-9.
32. Faron G. Prediction of preterm delivery by fetal fibronectin: a meta-analysis. *Obstetrics and Gynecology* 1998;**92**:153-8.
33. Fiorino AS. Electron-beam computed tomography, coronary artery calcium, and evaluation of patients with coronary artery disease. *Annals of Internal Medicine* 1998;839-47.
34. Fleischmann K E. Exercise echocardiography of exercise SPECT imaging: a meta analysis of diagnostic test performance. *JAMA* 1998;**280**:913-20.
35. Frost S C. Is stress radiography necessary in the diagnosis of acute or chronic ankle instability. *Clinical Journal of Sport Medicine* 1999;**9**:40-5.
36. Hallan S. The accuracy of C-reactive protein in diagnosing acute appendicitis. *Scandinavian Journal of Clinical and Laboratory Investigation* 1997;**57**:373-80.
37. Harvey S A. The dexamethasone suppression test for diagnosing depression in stroke patients. *Annals of Clinical Psychiatry* 1996;**8**:35-9.
38. Heffner J E. Pleural fluid chemical analysis in parapneumonic effusions: a meta-analysis. *American Journal of Respiratory & Critical Care Medicine* 1995;**151** :1700-8.

39. Heffner J E. Diagnostic value of tests that discriminate between exudative and transudative pleural effusions. *Chest* 1997;**111**:970-80.
40. Huicho L. Fecal screening tests in the approach to acute infectious diarrhea: a scientific overview. *Pediatric Infectious Disease Journal* 1996;**15**:486-94.
41. Huijgen H J. The clinical value of lactate dehydrogenase in serum: a quantitative review. *European Journal of Clinical Chemistry and Clinical Biochemistry* 1997;**35**:569-79.
42. Jensen L A. Meta-analysis of arterial oxygen saturation monitoring by pulse oximetry in adults. *Heart and Lung* 1998;**27**:387-408.
43. Jorm AF. Methods of screening for dementia: a meta-analysis of studies comparing an informant questionnaire with a brief cognitive test. *Alzheimer Disease and Associated Disorders* 1997;**11**:158-62.
44. Kallmes D F. Specificity of MR angiography as a confirmatory test of carotid artery stenosis. *American Journal of Neuroradiology* 1996;**17**:1501-6.
45. Kearon C. Noninvasive diagnosis of deep venous thrombosis. *Annals of Internal Medicine* 1998;**128**:663-77.
46. Koelemay M J. Diagnosis of arterial disease of the lower extremities with duplex ultrasonography. *British Journal of Surgery* 1996;**83**:404-9.
47. Kurz X. Chronic venous disorders of the leg: epidemiology, outcomes, diagnosis and management: summary of an evidence-based report of the VEINES task force. *International Angiology* 1999;**18**:83-102.

48. Lacasse Y. Transthoracic needle aspiration biopsy for the diagnosis of localised pulmonary lesions: a meta-analysis. *Thorax* 1999;**54**:884-93.
49. Lederle F A. Does this patient have abdominal aortic aneurysm? *JAMA* 1999;**281**:77-82.
50. Liedberg J. Evidence-based evaluation of three imaging methods for the temporomandibular disc. *Dento-Maxillo-Facial Radiology* 1996;**25**:234-41.
51. Littenberg B. Clinical efficacy of SPECT bone imaging for low back pain. *Journal of Nuclear Medicine* 1995;**36**:1707-13.
52. Loy C T. Do commercial serological kits for helicobacter pylori infection differ in accuracy? a meta-analysis. *American Journal of Gastroenterology* 1996;**91**:1138-44.
53. Mackenzie R. Magnetic resonance imaging of the knee: diagnostic performance statistics. *Clinical Radiology* 1996;**51**:251-7.
54. Maenza R L. A meta-analysis of blunt cardiac trauma: ending myocardial confusion. *American Journal of Emergency Medicine* 1996;**14**:237-41.
55. Mango L J. Interactive neural-network-assisted screening: a clinical assessment. *Acta Cytologica* 1998;**42**:233-45.
56. Markert R J. A pooled analysis of the Ottawa ankle rules used on adults in the ED. *American Journal of Emergency Medicine* 1998;**16**:564-7.
57. Mayer J. Systematic review of the diagnostic accuracy of dermatoscopy in detecting malignant melanoma. *Medical Journal of Australia* 1997;206-10.
58. McGee S. Is this patient hypovolemic? *JAMA* 1999;**281**:1022-9.

59. Merritt R M. Detection of cervical metastasis: a meta-analysis comparing computed tomography with physical examination. *Archives of Otolaryngology Head & Neck Surgery* 1997;**123**:149-52.
60. Metlay J P. Does this patient have community-acquired pneumonia? Diagnosing pneumonia by history and physical examination. *JAMA* 1997;**278**:1440-5.
61. Mitchell M F. Colposcopy for the diagnosis of squamous intraepithelial lesions: a meta-analysis. *Obstetrics and Gynecology* 1998;**91**:626-31.
62. Mol B W J. The accuracy of serum chlamydial antibodies in the diagnosis of tubal pathology: a meta-analysis. *Fertility & Sterility* 1997;**67**:1031-7.
63. Mol B W. The performance of CA-125 measurement in the detection of endometriosis: a meta-analysis. *Fertility and Sterility* 1998;**70**:1101-8.
64. Mol B W. The accuracy of single serum progesterone measurement in the diagnosis of ectopic pregnancy: a meta-analysis. *Human Reproduction* 1998;**13**:3220-7.
65. Mol B W. Sperm penetration assay in predicting successful in vitro fertilization: a meta-analysis. *Journal of Reproductive Medicine* 1998;**43**:503-8.
66. Moroney J T. Meta-analysis of the Hachinski Ischemic Score in pathologically verified dementias. *Neurology* 1997;**49**:1096-105.
67. Mushlin A I. Estimating the accuracy of screening mammography: a meta-analysis. *American Journal of Preventive Medicine* 1998;**14**:143-53.
68. Nuovo J. Is cervicography a useful diagnostic test? a systematic overview of the literature. *Journal of the American Board of Family Practice* 1997;**10**:390-7.

69. Oei S G. When is the post-coital test normal ? : a critical appraisal. *Human Reproduction* 1995;**10**:1711-4.
70. Olatidoye A G. Prognostic role of troponin T versus troponin I in unstable angina pectoris for cardiac events with meta-analysis comparing published studies. *American Journal of Cardiology* 1998;1405-10.
71. Orr R K. Ultrasonography to evaluate adults for appendicitis: decision making based on meta-analysis and probabilistic reasoning. *Academic Emergency Medicine* 1995;**2**:644-50.
72. Owens D K. A meta-analytic evaluation of the polymerase chain reaction for the diagnosis of HIV infection in infants. *JAMA* 1996;**275**:1342-8.
73. Owens D. Polymerase chain reaction for the diagnosis of HIV infection in adults a meta-analysis with recommendations for clinical practice and study design. *Annals of Internal Medicine* 1996;**124**:803-15.
74. Palomaki G E. Can reliable Down's syndrome detection rates be determined from prenatal screening intervention trials? *Journal of Medical Screening* 1996;12-7.
75. Pearl W S. Ultrasonography for the initial evaluation of blunt abdominal trauma: a review of prospective trials. *Annals of Emergency Medicine* 1996;**27**:353-61.
76. Rao J. The role of antineutrophil cytoplasmic antibody (c-ANCA) testing in the diagnosis of Wegener's granulomatosis a literature review and meta-analysis. *Annals of Internal Medicine* 1995;**123**:925-32.
77. Rappeport E D. MR imaging before arthroscopy in knee joint disorders? *Acta Radiologica* 1996;**37**:602-9.



78. Reed W W. Sputum gram's stain in community-acquired pneumococcal pneumonia: a meta-analysis. *Western Journal of Medicine* 1996;**165**:197-204.
79. Salekin R T. A review and meta-analysis of the psychopathy checklist and psychopathy checklist-revised: predictive validity of dangerousness. *Clinical Psychology Science and Practice* 1996;**3**:203-15.
80. Scheidler J. Radiological evaluation of lymph node metastases in patients with cervical cancer: a meta-analysis. *JAMA* 1997;**278**:1096-101.
81. Siegmanigra Y. Diagnosis of vascular catheter-related bloodstream infection: a meta-analysis. *Journal of Clinical Microbiology* 1997;**35**:928-36.
82. Smith-Bindman R. Endovaginal ultrasound to exclude endometrial cancer and other endometrial abnormalities. *JAMA* 1998;**280**:1510-7.
83. Spencer-Green G. Test performance in systemic sclerosis: anti-centromere and Anti-Scl-70 antibodies [review]. *American Journal of Medicine* 1997;**103**:242-8.
84. Storgaard H. The validity of the Michigan Alcoholism Screening Test (MAST). *Alcohol & Alcoholism* 1994;**29**:493-502.
85. Tenner S. Predicting gallstone pancreatitis with laboratory parameters: a meta-analysis. *American Journal of Gastroenterology* 1994;**89**:1863-6.
86. Tugwell P. Laboratory evaluation in the diagnosis of Lyme disease: clinical guideline, part 2. *Annals of Internal Medicine* 1997;**127**:1109-23.

87. van den Hoogen H M. On the accuracy of history, physical examination, and erythrocyte sedimentation rate in diagnosing low back pain in general practice. *Spine* 1995; **20**:318-27.
88. Wells P S. Accuracy of ultrasound for the diagnosis of deep venous thrombosis in asymptomatic patients after orthopedic surgery: a meta-analysis. *Annals of Internal Medicine* 1995;**122**:47-53.
89. Whited J D. Does this patient have a mole or a melanoma? *JAMA* 1998;**279**:696-701.
90. Zakzanis K. Structural and functional meta-analytic evidence for fronto-subcortical system deficit in progressive supranuclear palsy. *Brain and Cognition* 1998;**38**:283-96.
